# Supplementary material
Source: PubMed Central journal article supplement (PMC3663516)
Supplement: supp_M113.454751_jbc.M113.454751-1.pdf [file supp_M113.454751_jbc.M113.454751-1.pdf]

## SUPPLEMENTARY INFORMATION

### FIGURE LEGENDS

**Fig. S1** Gel-filtration chromatography of wild-type BglA-2 using Superdex 200 column. The chromatogram represents the absorbance at 280 nm. The elution volume in miniliter of the peak was labeled on the top.

**Fig. S2** Enzymatic assays of wild-type BglA-2 and mutants towards gentiobiose-6'P (A) and maltose-6'P (B)

**Fig. S3** Growth profiles of wild-type,  $\Delta BglA-2$  and  $\Delta BglA-2\&\Delta SP\_0303$  strains of *S. pneumoniae* TIGR4 on cellobiose as carbon source.

Fig. S1

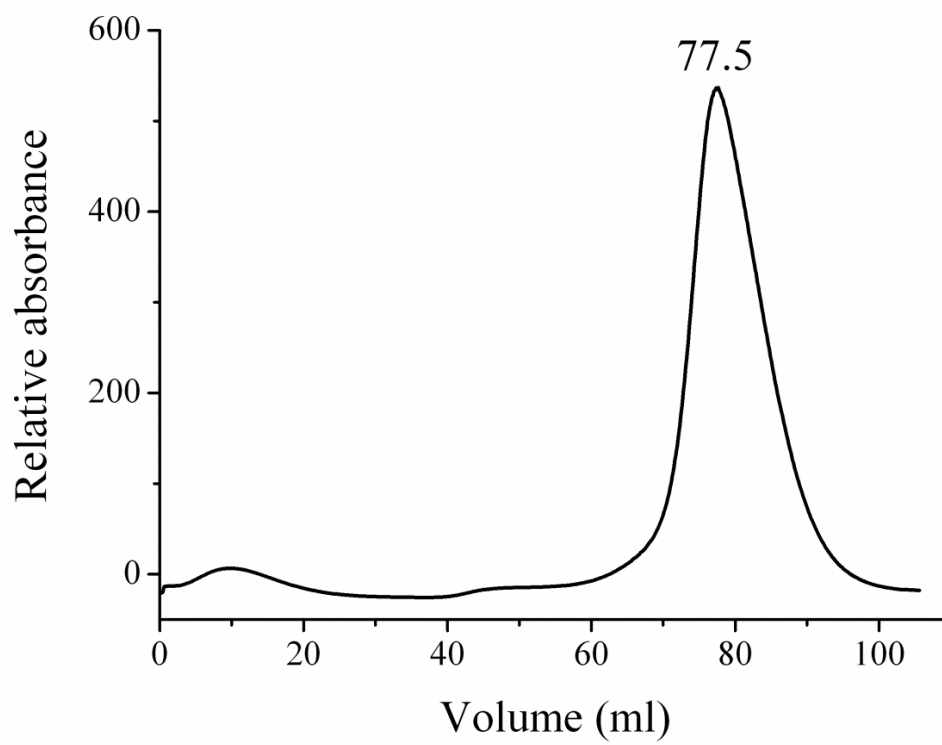

Fig. S2

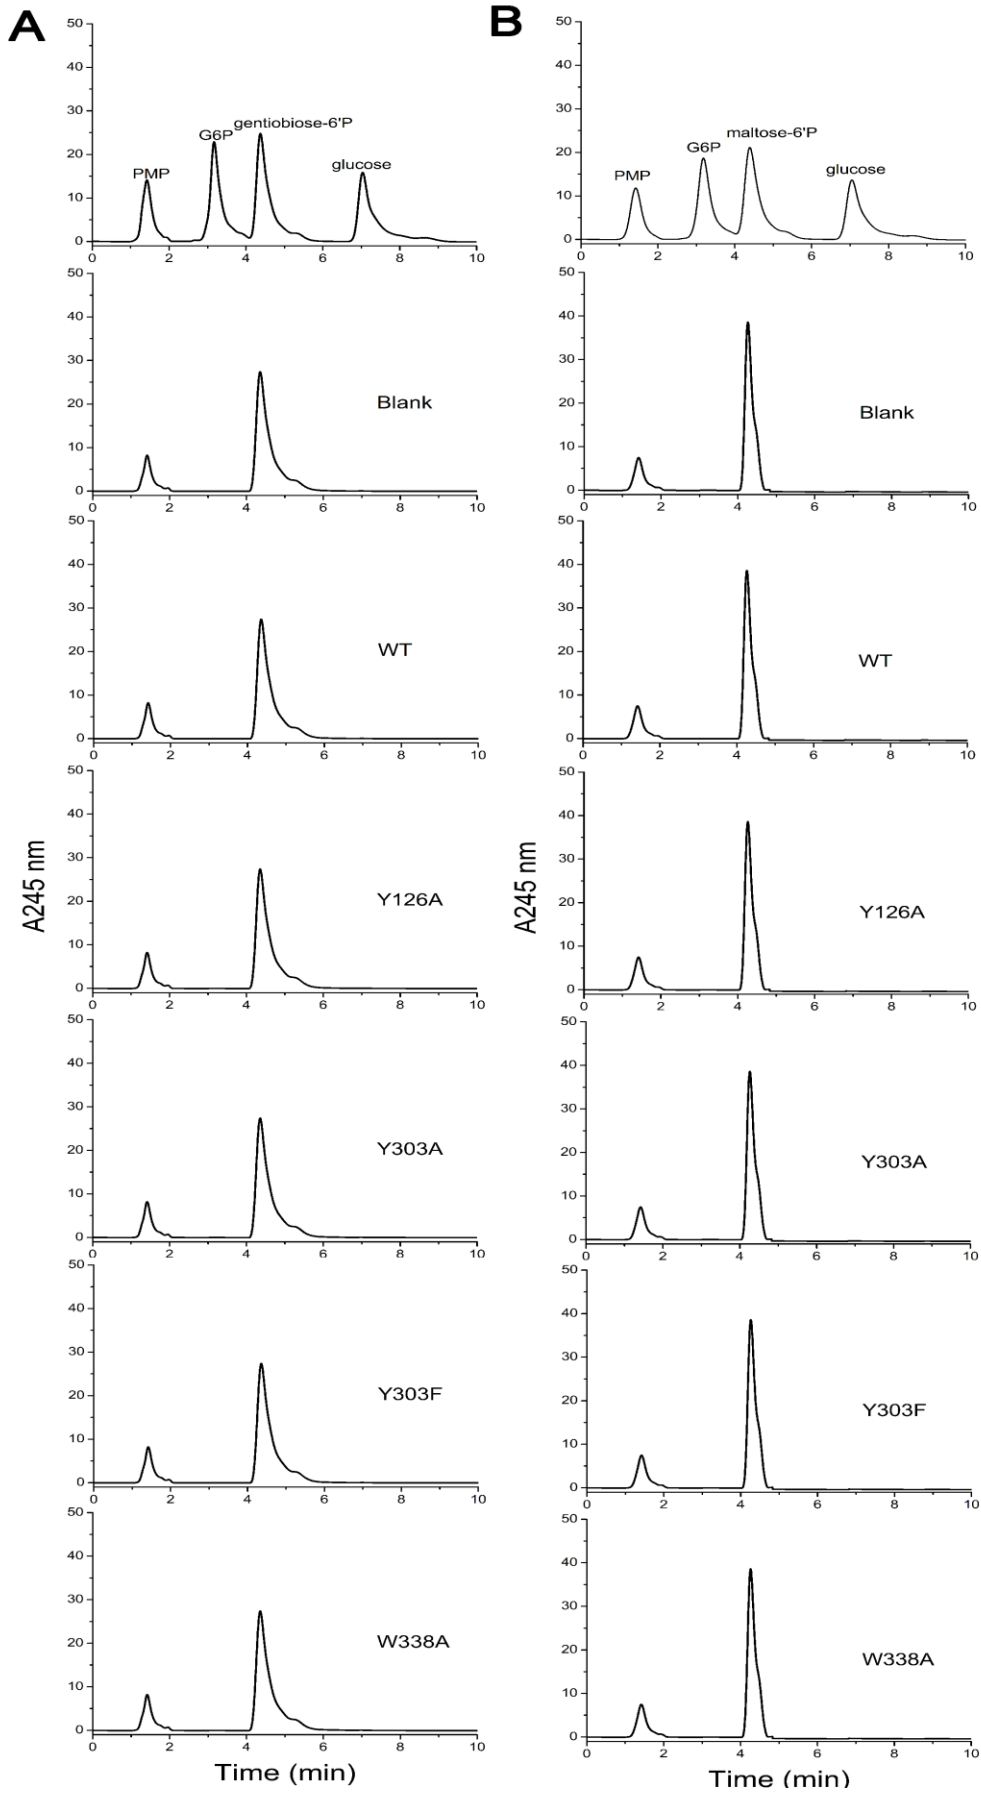

Fig. S3

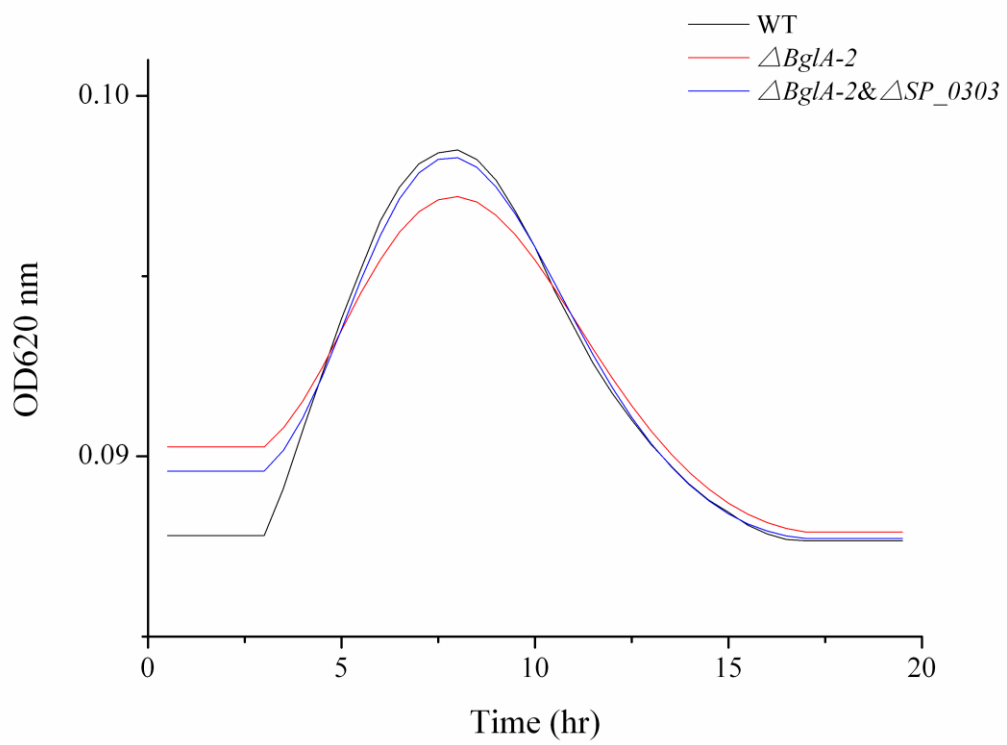

Table S1  $K_d$  constants of wild-type BglA-2 and mutants towards cellobiose-6'P.

| Enzyme    | $K_d$ ( $\mu\text{M}$ ) |
|-----------|-------------------------|
| Wild-type | 408.7 $\pm$ 9.3         |
| Y126A     | 2415 $\pm$ 8.5          |
| Y303A     | 2670 $\pm$ 6.4          |
| Y303F     | 2502 $\pm$ 9.3          |
| W338A     | 2705 $\pm$ 7.1          |

Table S2 Kinetic constants of wild-type BglA-2 and M423W mutant towards cellobiose-6'P or ONP $\beta$ Gal6P.

| Enzyme    | cellobiose-6'P         |                                     |                                                                             | ONP $\beta$ Gal6P      |                                                         |                                                                             |
|-----------|------------------------|-------------------------------------|-----------------------------------------------------------------------------|------------------------|---------------------------------------------------------|-----------------------------------------------------------------------------|
|           | $K_m$<br>$\mu\text{M}$ | $k_{\text{cat}}$<br>$\text{s}^{-1}$ | $k_{\text{cat}}/K_m$<br>$\times 10^{-1}$<br>$\text{s}^{-1}\mu\text{M}^{-1}$ | $K_m$<br>$\mu\text{M}$ | $k_{\text{cat}}$<br>$\times 10^{-3}$<br>$\text{s}^{-1}$ | $k_{\text{cat}}/K_m$<br>$\times 10^{-5}$<br>$\text{s}^{-1}\mu\text{M}^{-1}$ |
| Wild-type | 1135 $\pm$ 9.8         | 170 $\pm$ 3.8                       | 1.5 $\pm$ 0.2                                                               | ND                     | ND                                                      | ND                                                                          |
| M423W     | 1331 $\pm$ 12.5        | 139 $\pm$ 9.4                       | 1.0 $\pm$ 0.3                                                               | 904.3 $\pm$ 8.5        | 7.6 $\pm$ 6.4                                           | 8.6 $\pm$ 2.1                                                               |

ND: no detectable activity
